# Supplementary material
Source: PubMed Central journal article supplement (PMC7969445)

SUPPLEMENTAL MATERIAL

Supplemental Table I.

A. Concept set definitions for drug exposures

| <b>Category</b>                             | <b>RxNorm<br/>concept code</b> | <b>RxNorm<br/>concept name (active ingredient)*</b> |
|---------------------------------------------|--------------------------------|-----------------------------------------------------|
| Metformin                                   | 6809                           | Metformin                                           |
| Dipeptidyl peptidase 4 (DPP4)<br>inhibitors | 596554                         | Vildagliptin                                        |
|                                             | 593411                         | Sitagliptin                                         |
|                                             | 857974                         | Saxagliptin                                         |
|                                             | 1100699                        | Linagliptin                                         |
|                                             | 1368001                        | Alogliptin                                          |
| Glucagon-like peptide-1 (GLP1)<br>analogues | 1991302                        | Semaglutide                                         |
|                                             | 1440051                        | Lixisenatide                                        |
|                                             | 475968                         | Liraglutide                                         |
|                                             | 60548                          | Exenatide                                           |
|                                             | 1551291                        | Dulaglutide                                         |
|                                             | 1534763                        | Albiglutide                                         |
| Thiazolidinediones                          | 1991302                        | Semaglutide                                         |
|                                             | 72610                          | Troglitazone                                        |
|                                             | 84108                          | Rosiglitazone                                       |
| Sulfonylureas                               | 33738                          | Pioglitazone                                        |
|                                             | 10635                          | Tolbutamide                                         |
|                                             | 10633                          | Tolazamide                                          |
|                                             | 4815                           | Glyburide                                           |
|                                             | 25793                          | Gliquidone                                          |
|                                             | 4821                           | Glipizide                                           |
|                                             | 25789                          | Glimepiride                                         |
|                                             | 4816                           | Gliclazide                                          |
|                                             | 102846                         | Glibornuride                                        |
| 2404                                        | Chlorpropamide                 |                                                     |

|  |      |               |
|--|------|---------------|
|  | 2068 | Carbutamid    |
|  | 173  | Acetohexamide |

\* all drugs containing the ingredient

B. Concept set definitions for defining study groups and outcomes. For each concept set, we used the hierarchies of corresponding vocabularies and obtained a list of all child concepts for each concept in the table. We used OMOP Standardized Vocabularies as a reference (<https://athena.ohdsi.org>).

| Concept set                                    | Concept code | Concept name                                                 | Vocabulary |
|------------------------------------------------|--------------|--------------------------------------------------------------|------------|
| Diabetes mellitus type II                      | 44054006     | Type 2 diabetes mellitus                                     | SNOMED     |
| Diabetes mellitus type I                       | 46635009     | Type 1 diabetes mellitus                                     | SNOMED     |
| Gestational diabetes                           | 11687002     | Gestational diabetes mellitus                                | SNOMED     |
| Cardiac arrest                                 | 410429000    | Cardiac arrest                                               | SNOMED     |
| Atrial fibrillation                            | 49436004     | Atrial fibrillation                                          | SNOMED     |
| Atrial flutter and supraventricular arrhythmia | 72654001     | Supraventricular arrhythmia                                  | SNOMED     |
|                                                | 5370000      | Atrial flutter                                               | SNOMED     |
| Pacemaker or bradycardia                       | 60423000     | Sinus node dysfunction                                       | SNOMED     |
|                                                | 48867003     | Bradycardia                                                  | SNOMED     |
|                                                | 49710005     | Sinus bradycardia                                            | SNOMED     |
|                                                | C1786        | Pacemaker, single chamber, rate-responsive (implantable)     | HCPCS      |
|                                                | C2620        | Pacemaker, single chamber, non rate-responsive (implantable) | HCPCS      |
|                                                | C2621        | Pacemaker, other than single or dual chamber (implantable)   | HCPCS      |
|                                                | C1785        | Pacemaker, dual chamber, rate-responsive (implantable)       | HCPCS      |
|                                                | C2619        | Pacemaker, dual chamber, non rate-responsive (implantable)   | HCPCS      |
|                                                | C1898        | Lead, pacemaker, other than transvenous vdd single pass      | HCPCS      |
|                                                | 175135009    | Introduction of cardiac pacemaker system via vein            | SNOMED     |

|                                          |           |                                                                                                                           |          |
|------------------------------------------|-----------|---------------------------------------------------------------------------------------------------------------------------|----------|
|                                          | 0JH835Z   | Insertion of Pacemaker, Single Chamber Rate Responsive into Abdomen Subcutaneous Tissue and Fascia, Percutaneous Approach | ICD10PCS |
|                                          | 92960     | Cardioversion, elective, electrical conversion of arrhythmia; external                                                    | CPT4     |
|                                          | 233174007 | Cardiac pacemaker procedure                                                                                               | SNOMED   |
| Ventricular Tachycardia and Fibrillation | 25569003  | Ventricular tachycardia                                                                                                   | SNOMED   |
|                                          | 71908006  | Ventricular fibrillation                                                                                                  | SNOMED   |

\* SNOMED - Systematized Nomenclature of Medicine Clinical Terms; HCPCS - Healthcare Common Procedure Coding System; ICD10PCS - International Classification of Diseases, 10th Revision, Procedure Coding System; CPT4 - Current Procedural Terminology, 4th Edition.

Supplemental Table II. SNOMED concepts used as negative controls for p-value confidence interval calibration. Concepts and all their descendants within SNOMED hierarchy were used.

| <b>SNOMED concept code</b> | <b>SNOMED concept name</b>       |
|----------------------------|----------------------------------|
| 53726008                   | Acute conjunctivitis             |
| 15167005                   | Alcohol abuse                    |
| 61582004                   | Allergic rhinitis                |
| 197480006                  | Anxiety disorder                 |
| 13746004                   | Bipolar disorder                 |
| 57406009                   | Carpal tunnel syndrome           |
| 13645005                   | Chronic obstructive lung disease |
| 40055000                   | Chronic sinusitis                |
| 40275004                   | Contact dermatitis               |
| 22878006                   | Contusion of knee                |
| 64634000                   | Corneal opacity                  |
| 80967001                   | Dental caries                    |
| 79962008                   | Diffuse spasm of esophagus       |

|           |                                           |
|-----------|-------------------------------------------|
| 17322007  | Disease caused by parasite                |
| 25906001  | Disorder of ear                           |
| 41188003  | Disorder of oral soft tissues             |
| 75860007  | Disorder of pharynx                       |
| 3441005   | Disorder of sebaceous gland               |
| 32895009  | Hereditary disease                        |
| 111859007 | Herpes zoster without complication        |
| 240532009 | Human papilloma virus infection           |
| 40930008  | Hypothyroidism                            |
| 18070006  | Impacted cerumen                          |
| 400097005 | Ingrowing nail                            |
| 193462001 | Insomnia                                  |
| 38214006  | Internal hemorrhoids without complication |
| 209565008 | Lumbar sprain                             |
| 200936003 | Lupus erythematosus                       |
| 46206005  | Mood disorder                             |
| 191736004 | Obsessive-compulsive disorder             |
| 16001004  | Otalgia                                   |
| 65363002  | Otitis media                              |
| 202882003 | Plantar fasciitis                         |
| 41256004  | Presbyopia                                |
| 69322001  | Psychotic disorder                        |
| 70076002  | Rhinitis                                  |
| 31541009  | Sarcoidosis                               |
| 191567000 | Schizoaffective schizophrenia             |
| 58214004  | Schizophrenia                             |
| 23056005  | Sciatica                                  |
| 239815007 | Solitary sacroiliitis                     |

|          |                      |
|----------|----------------------|
| 6020002  | Tinea pedis          |
| 34713006 | Vitamin D deficiency |

Supplemental Table III. Number of patients before and after propensity score matching, number of events and mean follow-up for each outcome, comparing metformin and other anti-diabetic drugs; on-treatment.

|                                                | Target group | Comparator group | Before matching |         | After matching |         | Number of events |        | Mean follow-up, years |     |
|------------------------------------------------|--------------|------------------|-----------------|---------|----------------|---------|------------------|--------|-----------------------|-----|
|                                                |              |                  | T               | C       | T              | C       | T                | C      | T                     | C   |
| Atrial Fibrillation                            | Metformin    | TZD              | 190,180         | 88,258  | 47,161         | 50,633  | 4,977            | 2,319  | 2.9                   | 1.1 |
|                                                | Metformin    | DPP4             | 190,180         | 99,050  | 53,550         | 59,530  | 5,532            | 2,925  | 2.6                   | 1.1 |
|                                                | Metformin    | GLP1             | 190,180         | 26,380  | 16,438         | 17,338  | 1325             | 1033   | 2.6                   | 1.8 |
|                                                | Metformin    | Sulfonylurea     | 190,180         | 241,917 | 96,125         | 136,144 | 9,242            | 10,054 | 2.7                   | 1.5 |
| Atrial flutter and supraventricular arrhythmia | Metformin    | TZD              | 190,180         | 88,258  | 47,161         | 50,633  | 6,329            | 2,890  | 2.9                   | 1.1 |
|                                                | Metformin    | DPP4             | 190,180         | 99,050  | 53,550         | 59,530  | 6,828            | 3,622  | 2.6                   | 1.1 |
|                                                | Metformin    | GLP1             | 190,180         | 26,380  | 16,438         | 17,338  | 1716             | 1280   | 2.5                   | 1.7 |
|                                                | Metformin    | Sulfonylurea     | 190,180         | 241,917 | 96,125         | 136,144 | 11,581           | 12,353 | 2.7                   | 1.5 |
| Ventricular Tachycardia and Fibrillation       | Metformin    | TZD              | 190,180         | 88,258  | 47,161         | 50,633  | 53               | 17     | 3.1                   | 1.1 |
|                                                | Metformin    | DPP4             | 190,180         | 99,050  | 53,550         | 59,530  | 69               | 33     | 2.8                   | 1.2 |
|                                                | Metformin    | GLP1             | 190,180         | 26,380  | 16,438         | 17,338  | 26               | 12     | 2.7                   | 1.8 |
|                                                | Metformin    | Sulfonylurea     | 190,180         | 241,917 | 96,125         | 136,144 | 122              | 148    | 2.9                   | 1.6 |
| Bradycardia or pacemaker                       | Metformin    | TZD              | 190,180         | 88,258  | 47,161         | 50,633  | 2,852            | 1,144  | 3.0                   | 1.1 |
|                                                | Metformin    | DPP4             | 190,180         | 99,050  | 53,550         | 59,530  | 3,260            | 1,714  | 2.7                   | 1.1 |
|                                                | Metformin    | GLP1             | 190,180         | 26,380  | 16,438         | 17,338  | 852              | 576    | 2.6                   | 1.8 |
|                                                | Metformin    | Sulfonylurea     | 190,180         | 241,917 | 96,125         | 136,144 | 5,342            | 5,398  | 2.8                   | 1.5 |

Supplemental Table IV. Selected descriptive baseline patients characteristics for comparative effectiveness of first-line diabetes therapy; on-treatment.

IV.1. Selected descriptive baseline patient characteristics for comparative effectiveness of metformin (Mtf) vs sulfonylureas (Slfr).

| Variable                | Before PS adjustment |       |                         | After PS adjustment |       |                         |
|-------------------------|----------------------|-------|-------------------------|---------------------|-------|-------------------------|
|                         | Mtf                  | Slfr  | Standardized difference | Mtf                 | Slfr  | Standardized difference |
| Age                     |                      |       |                         |                     |       |                         |
| 50-54                   | 0.2%                 | 0.1%  | 0.02                    | 0.2%                | 0.2%  | 0.009                   |
| 55-59                   | 0.8%                 | 0.5%  | 0.033                   | 0.6%                | 0.6%  | 0.002                   |
| 65-69                   | 40.3%                | 31.8% | 0.176                   | 36.4%               | 36.8% | -0.009                  |
| 70-74                   | 25.0%                | 22.7% | 0.055                   | 24.7%               | 24.9% | -0.005                  |
| 75-79                   | 17.2%                | 18.6% | -0.039                  | 18.7%               | 18.5% | 0.004                   |
| 80-84                   | 9.8%                 | 14.3% | -0.136                  | 11.7%               | 11.4% | 0.009                   |
| 85-89                   | 4.0%                 | 7.8%  | -0.164                  | 4.9%                | 4.8%  | 0.007                   |
| 90-94                   | 0.9%                 | 2.5%  | -0.122                  | 1.1%                | 1.1%  | 0.002                   |
| 95-99                   | 0.1%                 | 0.4%  | -0.059                  | 0.1%                | 0.1%  | -0.005                  |
| Gender                  |                      |       |                         |                     |       |                         |
| Male                    | 49.5%                | 52.8% | -0.065                  | 51.1%               | 51.1% | 0.001                   |
| Female                  | 50.5%                | 47.2% | 0.065                   | 48.9%               | 48.9% | -0.001                  |
| Comorbidities           |                      |       |                         |                     |       |                         |
| Hypertensive Disorder   | 68.3%                | 68.8% | -0.01                   | 67.7%               | 67.7% | -0.002                  |
| Coronary Artery Disease | 19.3%                | 23.8% | -0.109                  | 20.6%               | 20.3% | 0.007                   |
| Heart Failure           | 4.2%                 | 8.2%  | -0.169                  | 4.9%                | 4.8%  | 0.005                   |
| Valvular Heart Disease  | 7.4%                 | 8.8%  | -0.049                  | 7.5%                | 7.5%  | 0.003                   |
| Hypothyroidism          | 10.4%                | 10.3% | 0.005                   | 10.8%               | 10.7% | 0.003                   |
| Hyperparathyroidism     | 0.8%                 | 0.7%  | 0.002                   | 0.7%                | 0.7%  | -0.002                  |

|                                   |       |       |        |       |       |        |
|-----------------------------------|-------|-------|--------|-------|-------|--------|
| Chronic kidney disorder           | 3.7%  | 13.3% | -0.349 | 4.5%  | 4.4%  | 0.008  |
| Chronic obstructive lung disorder | 7.8%  | 9.5%  | -0.059 | 8.1%  | 8.1%  | 0.002  |
| Asthma                            | 5.7%  | 5.2%  | 0.023  | 5.3%  | 5.3%  | 0.002  |
| <b>Drugs</b>                      |       |       |        |       |       |        |
| Beta blockers                     | 40.5% | 44.9% | -0.087 | 41.8% | 41.4% | 0.007  |
| Ca channel blockers               | 30.4% | 34.2% | -0.082 | 31.4% | 31.3% | 0.002  |
| ACE inhibitors                    | 47.4% | 49.0% | -0.032 | 48.4% | 48.5% | -0.003 |
| Anticoagulants                    | 15.2% | 19.7% | -0.118 | 16.4% | 16.2% | 0.007  |
| sStatins                          | 72.7% | 69.9% | 0.063  | 70.7% | 70.9% | -0.003 |

IV.2. Selected descriptive baseline patient characteristics for comparative effectiveness of metformin (Mtf) vs dipeptidyl peptidase 4 inhibitors (DPP4).

| Variable      | Before PS adjustment |       |                         | After PS adjustment |       |                         |
|---------------|----------------------|-------|-------------------------|---------------------|-------|-------------------------|
|               | Mtf                  | DPP4  | Standardized difference | Mtf                 | DPP4  | Standardized difference |
| <b>Age</b>    |                      |       |                         |                     |       |                         |
| 50-54         | 0.2%                 | 0.1%  | 0.02                    | 0.2%                | 0.1%  | 0.009                   |
| 55-59         | 0.7%                 | 0.5%  | 0.03                    | 0.5%                | 0.5%  | 0.002                   |
| 60-64         | 1.6%                 | 1.4%  | 0.019                   | 1.4%                | 1.4%  | 0.004                   |
| 65-69         | 39.7%                | 34.3% | 0.111                   | 35.2%               | 35.2% | -0.001                  |
| 70-74         | 25.0%                | 24.3% | 0.014                   | 24.5%               | 24.7% | -0.004                  |
| 75-79         | 17.4%                | 17.9% | -0.014                  | 17.9%               | 17.9% | -0.001                  |
| 80-84         | 10.2%                | 12.6% | -0.076                  | 12.3%               | 12.2% | 0.005                   |
| 85-89         | 4.2%                 | 6.6%  | -0.106                  | 6.1%                | 6.0%  | 0.002                   |
| 90-94         | 1.0%                 | 1.9%  | -0.081                  | 1.7%                | 1.7%  | -0.001                  |
| 95-99         | 0.1%                 | 0.3%  | -0.046                  | 0.2%                | 0.3%  | -0.012                  |
| <b>Gender</b> |                      |       |                         |                     |       |                         |
| Male          | 51.2%                | 51.4% | -0.004                  | 50.3%               | 50.3% | -0.001                  |
| Female        | 48.8%                | 48.6% | 0.004                   | 49.7%               | 49.7% | 0.001                   |

| Comorbidities                     |       |       |        |       |       |        |
|-----------------------------------|-------|-------|--------|-------|-------|--------|
| Hypertensive Disorder             | 67.1% | 71.9% | -0.103 | 70.6% | 70.6% | -0.001 |
| Coronary Artery Disease           | 19.4% | 25.1% | -0.136 | 23.9% | 23.6% | 0.007  |
| Heart Failure                     | 4.3%  | 8.4%  | -0.17  | 6.7%  | 6.6%  | 0.006  |
| Valvular Heart Disease            | 7.1%  | 10.5% | -0.12  | 9.4%  | 9.5%  | -0.003 |
| Hypothyroidism                    | 10.4% | 12.3% | -0.061 | 12.0% | 11.9% | 0.003  |
| Hyperparathyroidism               | 0.7%  | 0.9%  | -0.021 | 0.8%  | 0.9%  | -0.003 |
| Chronic kidney disorder           | 3.8%  | 17.2% | -0.45  | 9.0%  | 8.9%  | 0.006  |
| Chronic obstructive lung disorder | 7.6%  | 9.4%  | -0.064 | 8.9%  | 8.9%  | -0.001 |
| Asthma                            | 5.3%  | 5.7%  | -0.02  | 5.8%  | 5.8%  | 0.004  |
| Drugs                             |       |       |        |       |       |        |
| Beta blockers                     | 40.8% | 46.4% | -0.114 | 44.4% | 44.4% | -0.002 |
| Ca channel blockers               | 30.6% | 35.3% | -0.102 | 33.5% | 33.4% | 0.002  |
| ACE inhibitors                    | 49.5% | 44.9% | 0.091  | 44.5% | 45.1% | -0.01  |
| Anticoagulants                    | 15.4% | 19.9% | -0.118 | 18.8% | 18.6% | 0.004  |
| Statins                           | 72.7% | 75.0% | -0.052 | 73.9% | 74.1% | -0.005 |

IV.3. Selected descriptive baseline patient characteristics for comparative effectiveness of metformin (Mtf) vs thiazolidinediones (TZD).

| Variable | Before PS adjustment |       |                         | After PS adjustment |        |                         |
|----------|----------------------|-------|-------------------------|---------------------|--------|-------------------------|
|          | Mtf                  | TZD   | Standardized difference | Mtf                 | TZD    | Standardized difference |
| Age      |                      |       |                         |                     |        |                         |
| 50-54    | 0.2%                 | 0.1%  | 0.016                   | 0.2%                | Mtf 1% | 0.008                   |
| 55-59    | 0.8%                 | 0.5%  | 0.035                   | 0.6%                | 0.5%   | 0.009                   |
| 65-69    | 40.3%                | 33.1% | 0.149                   | 33.2%               | 33.3%  | -0.003                  |
| 70-74    | 24.6%                | 25.5% | -0.019                  | 25.6%               | 25.6%  | 0.001                   |



|                                   |       |       |        |       |       |        |
|-----------------------------------|-------|-------|--------|-------|-------|--------|
| 75-79                             | 17.2% | 19.1% | -0.05  | 19.3% | 19.2% | 0.002  |
| 80-84                             | 10.0% | 12.9% | -0.091 | 12.7% | 12.6% | 0.002  |
| 90-94                             | 0.9%  | 1.6%  | -0.055 | 1.4%  | 1.5%  | -0.006 |
| 95-99                             | 0.1%  | 0.2%  | -0.025 | 0.2%  | 0.2%  | -0.008 |
| Gender                            |       |       |        |       |       |        |
| Male                              | 50.5% | 57.9% | -0.15  | 56.7% | 56.3% | 0.009  |
| Female                            | 49.5% | 42.1% | 0.15   | 43.3% | 43.7% | -0.009 |
| Comorbidities                     |       |       |        |       |       |        |
| Hypertensive Disorder             | 67.9% | 63.1% | 0.1    | 63.1% | 63.3% | -0.003 |
| Coronary Artery Disease           | 19.8% | 20.9% | -0.029 | 21.1% | 20.6% | 0.011  |
| Heart Failure                     | 4.4%  | 5.0%  | -0.028 | 4.6%  | 4.6%  | 0.003  |
| Valvular Heart Disease            | 7.3%  | 7.3%  | -0.001 | 7.4%  | 7.1%  | 0.009  |
| Hypothyroidism                    | 10.7% | 8.4%  | 0.076  | 8.7%  | 8.7%  | 0.002  |
| Hyperparathyroidism               | 0.7%  | 0.5%  | 0.022  | 0.6%  | 0.5%  | 0.002  |
| Chronic kidney disorder           | 3.9%  | 12.4% | -0.317 | 7.5%  | 7.1%  | 0.016  |
| Chronic obstructive lung disorder | 7.8%  | 7.4%  | 0.016  | 7.4%  | 7.3%  | 0.003  |
| Asthma                            | 5.4%  | 4.3%  | 0.052  | 4.5%  | 4.4%  | 0.003  |
| Drugs                             |       |       |        |       |       |        |
| Beta blockers                     | 41.3% | 39.7% | 0.033  | 39.8% | 39.7% | 0.003  |
| Ca channel blockers               | 30.8% | 31.6% | -0.019 | 31.0% | 30.9% | 0.002  |
| ACE inhibitors                    | 49.1% | 49.5% | -0.011 | 49.0% | 49.4% | -0.007 |
| Anticoagulants                    | 15.6% | 17.8% | -0.058 | 17.7% | 17.2% | 0.012  |
| Statins                           | 72.5% | 75.4% | -0.067 | 74.8% | 74.6% | 0.006  |

IV.4. Selected descriptive baseline patient characteristics for comparative effectiveness of metformin (Mtf) vs glucagon-like peptide 1 receptor agonists (GLP-1).

| Variable                          | Before PS adjustment |       |                         | After PS adjustment |       |                         |
|-----------------------------------|----------------------|-------|-------------------------|---------------------|-------|-------------------------|
|                                   | Mtf                  | GLP-1 | Standardized difference | Mtf                 | GLP-1 | Standardized difference |
| Age                               |                      |       |                         |                     |       |                         |
| 50-54                             | 0.2%                 | 0.2%  | -0.011                  | 0.3%                | 0.2%  | 0.011                   |
| 55-59                             | 0.7%                 | 1.3%  | -0.058                  | 1.1%                | 1.3%  | -0.014                  |
| 60-64                             | 1.6%                 | 2.5%  | -0.063                  | 2.8%                | 2.5%  | 0.019                   |
| 65-69                             | 39.3%                | 54.0% | -0.298                  | 54.0%               | 53.5% | 0.009                   |
| 70-74                             | 17.6%                | 11.0% | 0.189                   | 11.1%               | 11.4% | -0.009                  |
| 75-79                             | 10.2%                | 4.1%  | 0.239                   | 3.9%                | 4.3%  | -0.019                  |
| 80-84                             | 4.2%                 | 1.0%  | 0.201                   | 0.9%                | 1.0%  | -0.012                  |
| 85-89                             | 0.9%                 | 0.1%  | 0.115                   | 0.2%                | 0.1%  | 0.021                   |
| 90-94                             | 0.2%                 | 0.2%  | -0.011                  | 0.3%                | 0.2%  | 0.011                   |
| Gender                            |                      |       |                         |                     |       |                         |
| Male                              | 51.8%                | 49.1% | 0.055                   | 48.2%               | 48.7% | -0.01                   |
| Female                            | 48.2%                | 50.9% | -0.055                  | 51.8%               | 51.3% | 0.01                    |
| Comorbidities                     |                      |       |                         |                     |       |                         |
| Hypertensive Disorder             | 66.9%                | 73.2% | -0.137                  | 71.6%               | 71.5% | 0.002                   |
| Coronary Artery Disease           | 19.6%                | 22.7% | -0.075                  | 22.4%               | 22.1% | 0.008                   |
| Heart Failure                     | 4.3%                 | 5.5%  | -0.056                  | 5.5%                | 5.2%  | 0.013                   |
| Valvular Heart Disease            | 7.2%                 | 7.8%  | -0.024                  | 7.5%                | 7.6%  | -0.002                  |
| Hypothyroidism                    | 10.2%                | 15.7% | -0.165                  | 15.2%               | 14.5% | 0.02                    |
| Hyperparathyroidism               | 0.7%                 | 0.9%  | -0.022                  | 0.9%                | 0.9%  | -0.003                  |
| Chronic kidney disorder           | 3.8%                 | 14.5% | -0.376                  | 4.3%                | 6.3%  | -0.089                  |
| Chronic obstructive lung disorder | 7.6%                 | 7.9%  | -0.012                  | 7.9%                | 7.7%  | 0.007                   |

|                     |       |       |        |       |       |        |
|---------------------|-------|-------|--------|-------|-------|--------|
| Asthma              | 5.2%  | 7.2%  | -0.082 | 7.0%  | 6.8%  | 0.009  |
| Drugs               |       |       |        |       |       |        |
| Beta blockers       | 41.0% | 43.4% | -0.049 | 42.9% | 42.8% | 0.002  |
| Ca channel blockers | 30.6% | 31.8% | -0.025 | 31.3% | 31.3% | 0.001  |
| ACE inhibitors      | 49.6% | 44.8% | 0.098  | 44.9% | 45.4% | -0.009 |
| Anticoagulants      | 15.5% | 17.1% | -0.044 | 16.9% | 16.8% | 0.003  |
| Statins             | 73.1% | 77.6% | -0.105 | 77.0% | 77.1% | -0.001 |

Supplemental Table V. Number of patients before and after propensity score matching, number of events and mean follow-up for each outcome, comparing metformin and other anti-diabetic drugs, intent-to-treat.

|                                                | Target group | Comparator group | Before matching |         | After matching |         | Number of events |        | Mean follow-up, years |     |
|------------------------------------------------|--------------|------------------|-----------------|---------|----------------|---------|------------------|--------|-----------------------|-----|
|                                                |              |                  | T               | C       | T              | C       | T                | C      | T                     | C   |
| Atrial Fibrillation                            | Metformin    | TZD              | 190,180         | 88,258  | 79,807         | 86,244  | 12,487           | 12,860 | 4.2                   | 3.7 |
|                                                | Metformin    | DPP4             | 190,180         | 99,050  | 84,677         | 94,719  | 11,666           | 12,579 | 3.7                   | 3.2 |
|                                                | Metformin    | GLP1             | 190,180         | 26,380  | 23,600         | 24,895  | 2,638            | 2,561  | 3.5                   | 3.0 |
|                                                | Metformin    | Sulfonylurea     | 190,180         | 241,917 | 170,620        | 232,056 | 23,449           | 33,851 | 3.9                   | 3.3 |
| Atrial flutter and supraventricular arrhythmia | Metformin    | TZD              | 190,180         | 88,258  | 79,807         | 86,244  | 15,645           | 15,853 | 4.1                   | 3.6 |
|                                                | Metformin    | DPP4             | 190,180         | 99,050  | 84,677         | 94,719  | 14,489           | 15,470 | 3.6                   | 3.1 |
|                                                | Metformin    | GLP1             | 190,180         | 26,380  | 23,600         | 24,895  | 3,355            | 3,209  | 3.4                   | 3.0 |
|                                                | Metformin    | Sulfonylurea     | 190,180         | 241,917 | 170,620        | 232,056 | 29,402           | 41,376 | 3.8                   | 3.2 |
| Ventricular Tachycardia and Fibrillation       | Metformin    | TZD              | 190,180         | 88,258  | 79,807         | 86,244  | 159              | 148    | 4.6                   | 4.1 |
|                                                | Metformin    | DPP4             | 190,180         | 99,050  | 84,677         | 94,719  | 173              | 148    | 4.0                   | 3.4 |
|                                                | Metformin    | GLP1             | 190,180         | 26,380  | 23,600         | 24,895  | 43               | 32     | 3.7                   | 3.2 |
|                                                | Metformin    | Sulfonylurea     | 190,180         | 241,917 | 170,620        | 232,056 | 298              | 442    | 4.2                   | 3.6 |
| Bradycardia or pacemaker                       | Metformin    | TZD              | 190,180         | 88,258  | 79,807         | 86,244  | 7,865            | 7,610  | 4.4                   | 3.9 |
|                                                | Metformin    | DPP4             | 190,180         | 99,050  | 84,677         | 94,719  | 7,610            | 8,091  | 3.8                   | 3.3 |
|                                                | Metformin    | GLP1             | 190,180         | 26,380  | 23,600         | 24,895  | 1,847            | 1,653  | 3.6                   | 3.1 |
|                                                | Metformin    | Sulfonylurea     | 190,180         | 241,917 | 170,620        | 232,056 | 15,124           | 20,490 | 4.0                   | 3.4 |

Supplemental Table VI. Estimated hazard ratios of arrhythmias among patients on metformin vs other anti-diabetic drugs. HR = hazard ratio with 95% confidence interval, intent-to-treat.

| Outcome                                        | DPP4             |         | GLP-1            |         | Sulfonylureas    |         | TZD              |         |
|------------------------------------------------|------------------|---------|------------------|---------|------------------|---------|------------------|---------|
|                                                | HR               | P-value | HR               | P-value | HR               | P-value | HR               | P-value |
| Atrial Fibrillation                            | 0.93 (0.90-0.96) | <0.01   | 0.95 (0.88-1.01) | 0.12    | 0.91 (0.90-0.94) | <0.01   | 0.94 (0.92-0.97) | <0.01   |
| Ventricular Tachycardia and Fibrillation       | 1.15 (0.86-1.51) | 0.35    | 1.19 (0.65-2.21) | 0.57    | 0.83 (0.70-1.00) | 0.06    | 1.12 (0.85-1.47) | 0.42    |
| Bradycardia                                    | 0.94 (0.91-0.98) | <0.01   | 1.04 (0.95-1.14) | 0.34    | 0.93 (0.91-0.96) | <0.01   | 1.00 (0.97-1.05) | 0.67    |
| Atrial flutter and supraventricular arrhythmia | 0.94 (0.91-0.97) | <0.01   | 0.97 (0.92-1.03) | 0.45    | 0.92 (0.90-0.93) | <0.01   | 0.95 (0.92-0.98) | <0.01   |

Supplemental Table VII. Number of patients before and after propensity score matching, number of events and mean follow-up for pairwise comparison of second-line diabetes therapy; on-treatment.

| Outcome             | Target group | Comparator group | Before matching |        | After matching |        | Number of events |       | Mean follow-up, years |     |
|---------------------|--------------|------------------|-----------------|--------|----------------|--------|------------------|-------|-----------------------|-----|
|                     |              |                  | T               | C      | T              | C      | T                | C     | T                     | C   |
| Atrial Fibrillation | DPP4         | GLP1             | 30,176          | 26,389 | 16,943         | 25,510 | 968              | 1,044 | 1.9                   | 1.4 |
|                     | DPP4         | Sulfonylureas    | 30,176          | 24,772 | 14,585         | 25,013 | 810              | 1,031 | 1.5                   | 1.4 |
|                     | DPP4         | TZD              | 30,176          | 9,793  | 7,861          | 19,969 | 309              | 819   | 1.5                   | 1.4 |
|                     | GLP1         | Sulfonylureas    | 26,389          | 24,772 | 10,934         | 19,580 | 567              | 1,173 | 1.5                   | 1.9 |
|                     | GLP1         | TZD              | 26,389          | 9,793  | 6,519          | 15,091 | 264              | 911   | 1.5                   | 2.0 |
|                     | TZD          | Sulfonylureas    | 9,793           | 24,772 | 8,164          | 8,497  | 441              | 316   | 1.6                   | 1.5 |

|                                                |      |               |        |        |        |        |       |       |     |     |
|------------------------------------------------|------|---------------|--------|--------|--------|--------|-------|-------|-----|-----|
| Ventricular Tachycardia and Fibrillation       | DPP4 | GLP1          | 30,176 | 26,389 | 16,943 | 25,510 | 10    | 7     | 2.0 | 1.4 |
|                                                | DPP4 | Sulfonylureas | 30,176 | 24,772 | 14,585 | 25,013 | 9     | 6     | 1.6 | 1.4 |
|                                                | DPP4 | TZD           | 30,176 | 9,793  | 7,861  | 19,969 | 4     | 6     | 1.5 | 1.5 |
|                                                | GLP1 | Sulfonylureas | 26,389 | 24,772 | 10,934 | 19,580 | 6     | 10    | 1.6 | 2.0 |
|                                                | GLP1 | TZD           | 26,389 | 9,793  | 6,519  | 15,091 | 4     | 11    | 1.5 | 2.1 |
|                                                | TZD  | Sulfonylureas | 9,793  | 24,772 | 8,164  | 8,497  | 5     | 5     | 1.7 | 1.5 |
| Atrial flutter and supraventricular arrhythmia | DPP4 | GLP1          | 30,176 | 26,389 | 16,943 | 25,510 | 1,224 | 1,348 | 1.9 | 1.4 |
|                                                | DPP4 | Sulfonylureas | 30,176 | 24,772 | 14,585 | 25,013 | 1,036 | 1,343 | 1.5 | 1.4 |
|                                                | DPP4 | TZD           | 30,176 | 9,793  | 7,861  | 19,969 | 442   | 1,074 | 1.4 | 1.4 |
|                                                | GLP1 | Sulfonylureas | 26,389 | 24,772 | 10,934 | 19,580 | 735   | 1,486 | 1.5 | 1.9 |
|                                                | GLP1 | TZD           | 26,389 | 9,793  | 6,519  | 15,091 | 363   | 1,144 | 1.5 | 2.0 |
|                                                | TZD  | Sulfonylureas | 9,793  | 24,772 | 8,164  | 8,497  | 581   | 459   | 1.6 | 1.4 |
| Bradycardia or pacemaker                       | DPP4 | GLP1          | 30,176 | 26,389 | 16,943 | 25,510 | 573   | 641   | 1.9 | 1.4 |
|                                                | DPP4 | Sulfonylureas | 30,176 | 24,772 | 14,585 | 25,013 | 447   | 611   | 1.6 | 1.4 |
|                                                | DPP4 | TZD           | 30,176 | 9,793  | 7,861  | 19,969 | 211   | 483   | 1.5 | 1.5 |
|                                                | GLP1 | Sulfonylureas | 26,389 | 24,772 | 10,934 | 19,580 | 333   | 674   | 1.6 | 2.0 |
|                                                | GLP1 | TZD           | 26,389 | 9,793  | 6,519  | 15,091 | 172   | 518   | 1.5 | 2.0 |
|                                                | TZD  | Sulfonylureas | 9,793  | 24,772 | 8,164  | 8,497  | 260   | 215   | 1.6 | 1.5 |

Supplemental Table VIII. Selected descriptive baseline patients characteristics for comparative effectiveness of second-line diabetes therapy; on-treatment.

VIII.1. Selected descriptive baseline patient characteristics for comparative effectiveness of glucagon-like peptide 1 receptor agonists (GLP-1) vs dipeptidyl peptidase 4 inhibitors (DPP4).

| Variable | Before PS adjustment |      |                         | After PS adjustment |      |                         |
|----------|----------------------|------|-------------------------|---------------------|------|-------------------------|
|          | GLP-1                | DPP4 | Standardized difference | GLP-1               | DPP4 | Standardized difference |
| Age      |                      |      |                         |                     |      |                         |
| 50-54    | 0.3%                 | 0.2% | 0.024                   | 0.3%                | 0.2% | 0.008                   |
| 55-59    | 1.4%                 | 0.7% | 0.061                   | 1.1%                | 1.0% | 0.013                   |

|                                   |       |       |        |       |       |        |
|-----------------------------------|-------|-------|--------|-------|-------|--------|
| 60-64                             | 2.7%  | 1.7%  | 0.065  | 2.2%  | 2.2%  | 0.002  |
| 70-74                             | 53.7% | 46.5% | 0.145  | 51.8% | 52.1% | -0.006 |
| 75-79                             | 26.0% | 25.7% | 0.007  | 26.1% | 26.5% | -0.009 |
| 80-84                             | 10.8% | 14.8% | -0.118 | 12.2% | 11.9% | 0.008  |
| 85-89                             | 4.0%  | 7.2%  | -0.141 | 4.9%  | 4.6%  | 0.015  |
| 90-94                             | 0.9%  | 2.5%  | -0.119 | 1.2%  | 1.2%  | 0.006  |
| Gender                            |       |       |        |       |       |        |
| Male                              | 50.1% | 53.9% | -0.075 | 51.3% | 51.0% | 0.006  |
| Female                            | 49.9% | 46.1% | 0.075  | 48.7% | 49.0% | -0.006 |
| Comorbidities                     |       |       |        |       |       |        |
| Hypertensive Disorder             | 72.7% | 70.7% | 0.045  | 71.9% | 72.0% | -0.002 |
| Coronary Artery Disease           | 22.4% | 21.6% | 0.021  | 21.1% | 21.0% | 0.003  |
| Heart Failure                     | 5.2%  | 4.5%  | 0.034  | 4.2%  | 4.4%  | -0.008 |
| Valvular Heart Disease            | 7.6%  | 8.4%  | -0.031 | 7.4%  | 7.5%  | -0.003 |
| Hypothyroidism                    | 15.0% | 12.3% | 0.079  | 13.7% | 13.8% | -0.002 |
| Hyperparathyroidism               | 0.9%  | 0.9%  | -0.001 | 0.9%  | 1.0%  | -0.005 |
| Chronic kidney disorder           | 12.5% | 4.6%  | 0.286  | 6.1%  | 6.3%  | -0.012 |
| Chronic obstructive lung disorder | 7.8%  | 7.0%  | 0.03   | 6.9%  | 7.0%  | -0.003 |
| Asthma                            | 6.9%  | 5.7%  | 0.046  | 6.2%  | 6.1%  | 0.001  |
| Drugs                             |       |       |        |       |       |        |
| Beta blockers                     | 43.4% | 40.0% | 0.069  | 40.8% | 40.9% | -0.002 |
| Ca channel blockers               | 31.8% | 30.8% | 0.021  | 30.9% | 30.6% | 0.007  |
| ACE inhibitors                    | 46.8% | 44.7% | 0.043  | 46.0% | 46.1% | -0.001 |
| Anticoagulants                    | 16.7% | 15.7% | 0.027  | 15.5% | 15.6% | -0.003 |
| Statins                           | 78.4% | 75.1% | 0.079  | 76.8% | 77.0% | -0.006 |

VIII.2. Selected descriptive baseline patient characteristics for comparative effectiveness of sulfonylureas (Slfr) vs dipeptidyl peptidase 4 inhibitors (DPP4).

| Variable                | Before PS adjustment |       |                         | After PS adjustment |       |                         |
|-------------------------|----------------------|-------|-------------------------|---------------------|-------|-------------------------|
|                         | Slfr                 | DPP4  | Standardized difference | Slfr                | DPP4  | Standardized difference |
| <b>Age</b>              |                      |       |                         |                     |       |                         |
| 50-54                   | 0.2%                 | 0.2%  | -0.001                  | 0.2%                | 0.1%  | 0.014                   |
| 55-59                   | 0.7%                 | 0.8%  | -0.014                  | 0.8%                | 0.8%  | -0.004                  |
| 60-64                   | 1.6%                 | 1.8%  | -0.016                  | 1.7%                | 1.6%  | 0.013                   |
| 65-69                   | 37.7%                | 47.3% | -0.194                  | 42.7%               | 42.6% | 0.003                   |
| 70-74                   | 25.9%                | 25.6% | 0.008                   | 26.2%               | 26.0% | 0.006                   |
| 75-79                   | 18.3%                | 14.5% | 0.104                   | 16.0%               | 16.4% | -0.012                  |
| 80-84                   | 10.4%                | 6.9%  | 0.124                   | 8.2%                | 8.6%  | -0.017                  |
| 85-89                   | 4.3%                 | 2.4%  | 0.107                   | 3.3%                | 3.1%  | 0.008                   |
| 90-94                   | 0.8%                 | 0.5%  | 0.037                   | 0.8%                | 0.6%  | 0.016                   |
| 95-99                   | 0.1%                 | 0.1%  | 0.015                   | 0.1%                | 0.1%  | 0.018                   |
| <b>Gender</b>           |                      |       |                         |                     |       |                         |
| Male                    | 54.8%                | 53.8% | 0.02                    | 53.6%               | 53.8% | -0.005                  |
| Female                  | 45.2%                | 46.2% | -0.02                   | 46.4%               | 46.2% | 0.005                   |
| <b>Comorbidities</b>    |                      |       |                         |                     |       |                         |
| Hypertensive Disorder   | 64.6%                | 70.7% | -0.131                  | 67.7%               | 66.9% | 0.016                   |
| Coronary Artery Disease | 20.4%                | 21.5% | -0.028                  | 20.8%               | 20.6% | 0.004                   |
| Heart Failure           | 4.6%                 | 4.4%  | 0.007                   | 4.6%                | 4.4%  | 0.007                   |
| Valvular Heart Disease  | 7.2%                 | 8.4%  | -0.043                  | 7.5%                | 7.7%  | -0.004                  |
| Hypothyroidism          | 8.1%                 | 12.3% | -0.139                  | 9.5%                | 9.5%  | -0.001                  |
| Hyperparathyroidism     | 0.6%                 | 0.9%  | -0.037                  | 0.7%                | 0.8%  | -0.011                  |
| Chronic kidney disorder | 3.9%                 | 4.6%  | -0.035                  | 4.3%                | 4.1%  | 0.01                    |

|                                   |       |       |        |       |       |        |
|-----------------------------------|-------|-------|--------|-------|-------|--------|
| Chronic obstructive lung disorder | 6.9%  | 7.0%  | -0.001 | 6.8%  | 6.8%  | 0.003  |
| Asthma                            | 4.3%  | 5.7%  | -0.067 | 4.7%  | 4.7%  | -0.002 |
| <b>Drugs</b>                      |       |       |        |       |       |        |
| Beta blockers                     | 39.4% | 39.9% | -0.011 | 39.6% | 39.6% | -0.001 |
| Ca channel blockers               | 32.5% | 30.8% | 0.038  | 32.1% | 32.2% | -0.001 |
| ACE inhibitors                    | 51.1% | 44.4% | 0.133  | 47.9% | 48.1% | -0.002 |
| Anticoagulants                    | 16.8% | 15.7% | 0.031  | 16.0% | 16.1% | -0.001 |
| Statins                           | 70.1% | 75.3% | -0.118 | 72.1% | 71.8% | 0.007  |

VIII.3. Selected descriptive baseline patient characteristics for comparative effectiveness of sulfonylureas (Slfr) vs glucagon-like peptide 1 inhibitors (GLP-1).

| Variable             | Before PS adjustment |       |                         | After PS adjustment |       |                         |
|----------------------|----------------------|-------|-------------------------|---------------------|-------|-------------------------|
|                      | Slfr                 | GLP-1 | Standardized difference | Slfr                | GLP-1 | Standardized difference |
| <b>Age</b>           |                      |       |                         |                     |       |                         |
| 50-54                | 0.2%                 | 0.3%  | -0.028                  | 0.2%                | 0.2%  | -0.003                  |
| 55-59                | 0.7%                 | 1.3%  | -0.068                  | 1.0%                | 1.0%  | -0.004                  |
| 60-64                | 1.5%                 | 2.7%  | -0.081                  | 2.2%                | 2.2%  | -0.001                  |
| 65-69                | 36.8%                | 53.7% | -0.343                  | 48.2%               | 47.3% | 0.019                   |
| 70-74                | 26.0%                | 26.1% | -0.001                  | 27.2%               | 27.1% | 0.003                   |
| 75-79                | 18.7%                | 10.9% | 0.222                   | 13.9%               | 14.4% | -0.017                  |
| 80-84                | 10.7%                | 3.9%  | 0.261                   | 5.6%                | 5.9%  | -0.014                  |
| 85-89                | 4.4%                 | 0.9%  | 0.218                   | 1.3%                | 1.6%  | -0.02                   |
| 90-94                | 0.9%                 | 0.1%  | 0.109                   | 0.2%                | 0.2%  | 0.008                   |
| <b>Gender</b>        |                      |       |                         |                     |       |                         |
| Male                 | 54.7%                | 50.0% | 0.094                   | 51.1%               | 51.6% | -0.009                  |
| Female               | 45.3%                | 50.0% | -0.094                  | 48.9%               | 48.4% | 0.009                   |
| <b>Comorbidities</b> |                      |       |                         |                     |       |                         |
| Hypertensive         | 64.6%                | 73.1% | -0.183                  | 67.0%               | 66.4% | 0.014                   |



|                                   |       |       |        |       |       |        |
|-----------------------------------|-------|-------|--------|-------|-------|--------|
| Disorder                          |       |       |        |       |       |        |
| Coronary Artery Disease           | 20.4% | 22.5% | -0.05  | 20.9% | 20.5% | 0.01   |
| Heart Failure                     | 4.6%  | 5.2%  | -0.027 | 4.5%  | 4.4%  | 0.006  |
| Valvular Heart Disease            | 7.3%  | 7.7%  | -0.015 | 7.1%  | 6.9%  | 0.009  |
| Hypothyroidism                    | 8.1%  | 15.0% | -0.22  | 10.1% | 9.7%  | 0.011  |
| Hyperparathyroidism               | 0.6%  | 0.9%  | -0.037 | 0.7%  | 0.7%  | 0.003  |
| Chronic kidney disorder           | 3.9%  | 12.5% | -0.319 | 5.9%  | 5.7%  | 0.012  |
| Chronic obstructive lung disorder | 6.9%  | 7.8%  | -0.033 | 6.8%  | 6.8%  | 0.003  |
| Asthma                            | 4.3%  | 6.9%  | -0.112 | 5.2%  | 4.8%  | 0.018  |
| Drugs                             |       |       |        |       |       |        |
| Beta blockers                     | 39.3% | 43.4% | -0.082 | 40.5% | 40.5% | 0.001  |
| Ca channel blockers               | 32.7% | 31.8% | 0.019  | 32.2% | 31.8% | 0.009  |
| ACE inhibitors                    | 51.1% | 46.4% | 0.095  | 49.2% | 49.7% | -0.009 |
| Anticoagulants                    | 16.9% | 16.8% | 0.003  | 16.1% | 16.2% | -0.003 |
| Statins                           | 69.8% | 78.5% | -0.2   | 74.9% | 74.0% | 0.02   |

VIII.4. Selected descriptive baseline patient characteristics for comparative effectiveness of sulfonylureas (Slfr) vs thiazolidinediones (TZD).

| Variable | Before PS adjustment |       |                         | After PS adjustment |       |                         |
|----------|----------------------|-------|-------------------------|---------------------|-------|-------------------------|
|          | Slfr                 | TZD   | Standardized difference | Slfr                | TZD   | Standardized difference |
| Age      |                      |       |                         |                     |       |                         |
| 50-54    | 0.2%                 | 0.2%  | 0.002                   | 0.2%                | 0.2%  | 0.011                   |
| 55-59    | 0.7%                 | 0.7%  | -0.002                  | 0.8%                | 0.6%  | 0.028                   |
| 60-64    | 1.6%                 | 1.6%  | -0.005                  | 2.0%                | 1.6%  | 0.029                   |
| 65-69    | 37.8%                | 43.8% | -0.123                  | 42.7%               | 42.7% | 0.001                   |
| 70-74    | 18.3%                | 16.1% | 0.058                   | 16.3%               | 16.6% | -0.007                  |

|                                   |       |       |        |       |       |        |
|-----------------------------------|-------|-------|--------|-------|-------|--------|
| 75-79                             | 10.3% | 7.7%  | 0.093  | 7.5%  | 8.1%  | -0.02  |
| 80-84                             | 4.2%  | 2.6%  | 0.089  | 2.7%  | 2.8%  | -0.009 |
| 85-89                             | 0.8%  | 0.5%  | 0.038  | 0.7%  | 0.6%  | 0.021  |
| 90-94                             | 0.2%  | 0.2%  | 0.002  | 0.2%  | 0.2%  | 0.011  |
| Gender                            |       |       |        |       |       |        |
| Male                              | 54.6% | 60.6% | -0.121 | 60.1% | 59.4% | 0.016  |
| Female                            | 45.4% | 39.4% | 0.121  | 39.9% | 40.6% | -0.016 |
| Comorbidities                     |       |       |        |       |       |        |
| Hypertensive Disorder             | 64.5% | 62.4% | 0.044  | 63.7% | 62.9% | 0.016  |
| Coronary Artery Disease           | 20.4% | 18.0% | 0.06   | 18.2% | 18.0% | 0.004  |
| Heart Failure                     | 4.6%  | 3.2%  | 0.071  | 3.4%  | 3.3%  | 0.005  |
| Valvular Heart Disease            | 7.2%  | 6.6%  | 0.023  | 6.7%  | 6.8%  | -0.005 |
| Hypothyroidism                    | 8.1%  | 8.0%  | 0.006  | 8.2%  | 8.0%  | 0.009  |
| Hyperparathyroidism               | 0.6%  | 0.5%  | 0.02   | 0.6%  | 0.4%  | 0.022  |
| Chronic kidney disorder           | 3.9%  | 3.6%  | 0.015  | 3.5%  | 3.7%  | -0.012 |
| Chronic obstructive lung disorder | 6.9%  | 6.7%  | 0.007  | 6.8%  | 6.8%  | -0.002 |
| Asthma                            | 4.3%  | 4.2%  | 0.006  | 4.4%  | 4.4%  | 0.003  |
| Drugs                             |       |       |        |       |       |        |
| Beta blockers                     | 39.3% | 35.0% | 0.089  | 34.9% | 35.7% | -0.017 |
| Ca channel blockers               | 32.5% | 28.4% | 0.089  | 27.8% | 29.0% | -0.025 |
| ACE inhibitors                    | 51.0% | 47.3% | 0.076  | 46.1% | 47.1% | -0.019 |
| Anticoagulants                    | 16.8% | 14.4% | 0.064  | 14.7% | 14.5% | 0.008  |
| Statins                           | 70.1% | 76.9% | -0.154 | 76.6% | 75.8% | 0.018  |

VIII.5. Selected descriptive baseline patient characteristics for comparative effectiveness of thiazolidinediones (TZD) vs dipeptidyl peptidase 4 inhibitors (DPP4).

| Variable                          | Before PS adjustment |       |                         | After PS adjustment |       |                         |
|-----------------------------------|----------------------|-------|-------------------------|---------------------|-------|-------------------------|
|                                   | TZD                  | DPP4  | Standardized difference | TZD                 | DPP4  | Standardized difference |
| Age                               |                      |       |                         |                     |       |                         |
| 55-59                             | 0.7%                 | 0.8%  | -0.012                  | 0.6%                | 0.8%  | -0.028                  |
| 60-64                             | 1.6%                 | 1.8%  | -0.014                  | 1.7%                | 1.6%  | 0.005                   |
| 65-69                             | 43.9%                | 47.4% | -0.07                   | 43.5%               | 43.9% | -0.009                  |
| 70-74                             | 26.7%                | 25.5% | 0.026                   | 26.7%               | 27.2% | -0.011                  |
| 75-79                             | 16.0%                | 14.4% | 0.045                   | 16.2%               | 15.8% | 0.012                   |
| 80-84                             | 7.7%                 | 6.9%  | 0.03                    | 7.9%                | 7.6%  | 0.011                   |
| 85-89                             | 2.7%                 | 2.4%  | 0.017                   | 2.7%                | 2.4%  | 0.016                   |
| 90-94                             | 0.5%                 | 0.5%  | -0.002                  | 0.6%                | 0.4%  | 0.019                   |
| Gender                            |                      |       |                         |                     |       |                         |
| Male                              | 60.4%                | 53.5% | 0.14                    | 59.0%               | 59.9% | -0.018                  |
| Female                            | 39.6%                | 46.5% | -0.14                   | 41.0%               | 40.1% | 0.018                   |
| Comorbidities                     |                      |       |                         |                     |       |                         |
| Hypertensive Disorder             | 62.6%                | 70.9% | -0.176                  | 63.5%               | 62.4% | 0.023                   |
| Coronary Artery Disease           | 18.0%                | 21.6% | -0.089                  | 18.2%               | 18.4% | -0.003                  |
| Heart Failure                     | 3.2%                 | 4.5%  | -0.064                  | 3.4%                | 3.6%  | -0.009                  |
| Valvular Heart Disease            | 6.7%                 | 8.4%  | -0.065                  | 6.9%                | 6.8%  | 0.004                   |
| Hypothyroidism                    | 8.0%                 | 12.4% | -0.144                  | 8.3%                | 8.4%  | -0.004                  |
| Hyperparathyroidism               | 0.4%                 | 0.9%  | -0.063                  | 0.4%                | 0.7%  | -0.028                  |
| Chronic kidney disorder           | 3.6%                 | 4.6%  | -0.049                  | 3.8%                | 3.4%  | 0.02                    |
| Chronic obstructive lung disorder | 6.7%                 | 6.9%  | -0.009                  | 6.9%                | 6.6%  | 0.01                    |
| Asthma                            | 4.2%                 | 5.7%  | -0.07                   | 4.4%                | 4.3%  | 0.003                   |

| Drugs               |       |       |        |       |       |        |
|---------------------|-------|-------|--------|-------|-------|--------|
| Beta blockers       | 35.2% | 39.9% | -0.099 | 36.1% | 35.9% | 0.004  |
| Ca channel blockers | 28.6% | 30.8% | -0.049 | 29.0% | 29.3% | -0.006 |
| ACE inhibitors      | 47.7% | 44.7% | 0.061  | 46.6% | 46.5% | 0.001  |
| Anticoagulants      | 14.5% | 15.8% | -0.034 | 14.8% | 14.5% | 0.007  |
| Statins             | 76.8% | 75.2% | 0.037  | 76.4% | 76.3% | 0.001  |

VIII.6. Selected descriptive baseline patient characteristics for comparative effectiveness of thiazolidinediones (TZD) vs glucagon-like peptide 1 receptor agonists (GLP-1).

| Variable                | Before PS adjustment |       |                         | After PS adjustment |       |                         |
|-------------------------|----------------------|-------|-------------------------|---------------------|-------|-------------------------|
|                         | TZD                  | GLP-1 | Standardized difference | TZD                 | GLP-1 | Standardized difference |
| Age                     |                      |       |                         |                     |       |                         |
| 50-54                   | 0.1%                 | 0.3%  | -0.031                  | 0.2%                | 0.2%  | -0.008                  |
| 55-59                   | 0.6%                 | 1.3%  | -0.074                  | 0.7%                | 0.8%  | -0.022                  |
| 60-64                   | 1.5%                 | 2.7%  | -0.079                  | 1.8%                | 2.0%  | -0.017                  |
| 65-69                   | 43.0%                | 53.6% | -0.212                  | 46.8%               | 46.6% | 0.005                   |
| 70-74                   | 26.7%                | 26.2% | 0.013                   | 27.4%               | 27.3% | 0.004                   |
| 75-79                   | 16.6%                | 10.9% | 0.167                   | 15.0%               | 14.9% | 0.001                   |
| 80-84                   | 7.9%                 | 3.9%  | 0.17                    | 6.1%                | 6.3%  | -0.007                  |
| 85-89                   | 2.7%                 | 0.9%  | 0.134                   | 1.6%                | 1.7%  | -0.008                  |
| 90-94                   | 0.5%                 | 0.1%  | 0.078                   | 0.4%                | 0.2%  | 0.042                   |
| Gender                  |                      |       |                         |                     |       |                         |
| Male                    | 60.6%                | 49.9% | 0.216                   | 57.1%               | 58.1% | -0.019                  |
| Female                  | 39.4%                | 50.1% | -0.216                  | 42.9%               | 41.9% | 0.019                   |
| Comorbidities           |                      |       |                         |                     |       |                         |
| Hypertensive Disorder   | 62.4%                | 73.1% | -0.23                   | 63.7%               | 62.7% | 0.02                    |
| Coronary Artery Disease | 13.6%                | 17.3% | -0.102                  | 14.2%               | 13.8% | 0.01                    |

|                                   |       |       |        |       |       |        |
|-----------------------------------|-------|-------|--------|-------|-------|--------|
| Heart Failure                     | 3.3%  | 5.2%  | -0.095 | 3.5%  | 3.4%  | 0.007  |
| Valvular Heart Disease            | 6.6%  | 7.7%  | -0.042 | 6.6%  | 6.5%  | 0.005  |
| Hypothyroidism                    | 7.8%  | 15.0% | -0.228 | 8.8%  | 8.5%  | 0.011  |
| Hyperparathyroidism               | 0.5%  | 1.0%  | -0.053 | 0.6%  | 0.6%  | -0.01  |
| Chronic kidney disorder           | 3.6%  | 12.5% | -0.331 | 4.4%  | 4.3%  | 0.006  |
| Chronic obstructive lung disorder | 6.8%  | 7.8%  | -0.039 | 6.7%  | 6.5%  | 0.007  |
| Asthma                            | 4.2%  | 6.9%  | -0.117 | 4.6%  | 4.6%  | 0.003  |
| Drugs                             |       |       |        |       |       |        |
| Beta blockers                     | 35.1% | 43.4% | -0.172 | 36.9% | 36.6% | 0.006  |
| Ca channel blockers               | 28.5% | 31.8% | -0.073 | 29.0% | 29.1% | -0.003 |
| ACE inhibitors                    | 47.1% | 46.4% | 0.013  | 46.7% | 47.1% | -0.007 |
| Anticoagulants                    | 14.5% | 16.8% | -0.062 | 15.0% | 15.0% | -0.002 |
| Statins                           | 76.4% | 78.4% | -0.048 | 76.8% | 76.5% | 0.005  |

Supplemental Figure I. Covariate balance (standardized difference of mean) before and after propensity score matching for each drug comparison and outcome, comparing metformin and other antidiabetic drugs (sulfonylureas, thiazolidinediones, dipeptidyl peptidase 4 inhibitors, glucagon-like peptide-1 analogues); on-treatment.

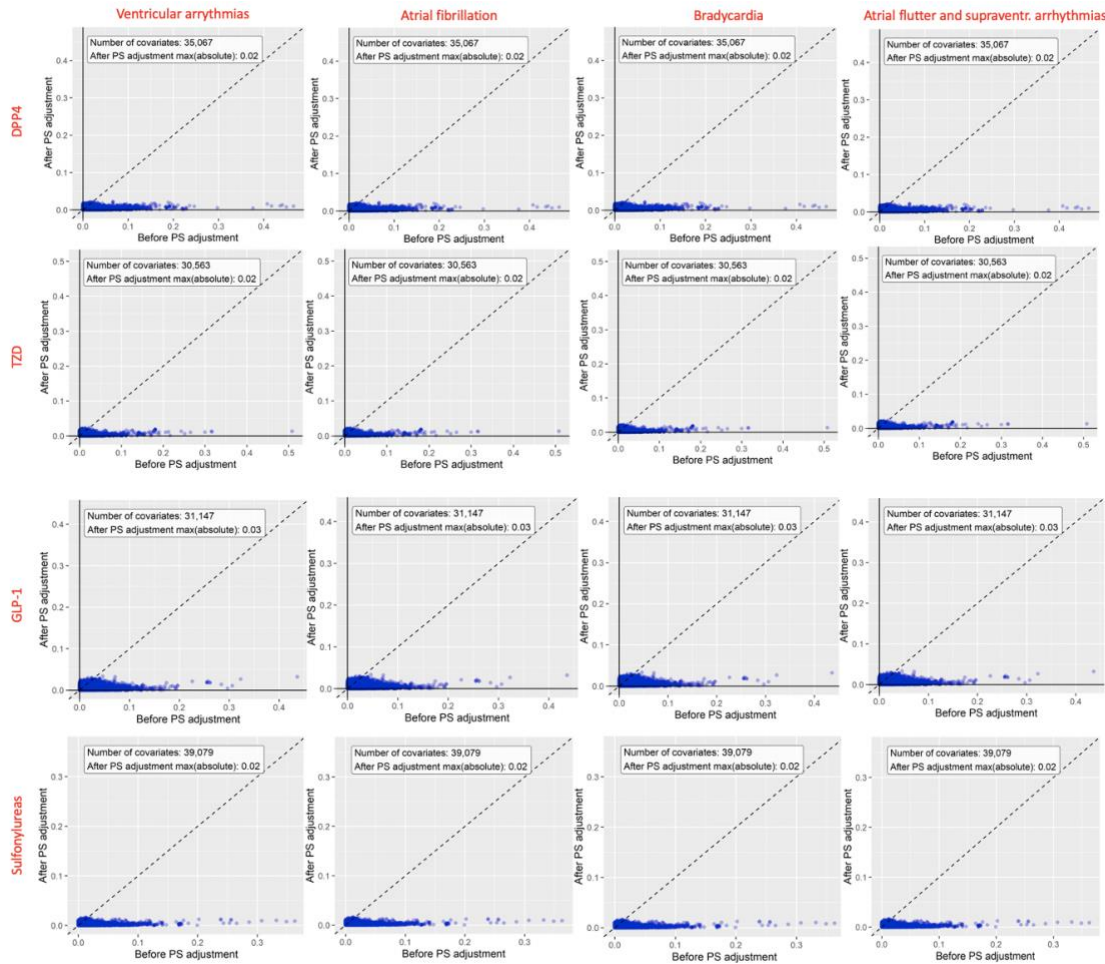

Supplemental Figure II. Empirical calibration plots where estimates below the dashed line in gray area (small area above the orange area) have  $p < 0.05$  using traditional p-value calculation, comparison of first-line anti-diabetic therapy; on-treatment. 1 – metformin vs DPP4, 2 – metformin vs GLP1, 3 – metformin vs TZD, 4 – metformin vs sulfonylureas. Estimates in the orange area have  $p < 0.05$  using calibrated p-value calculation.

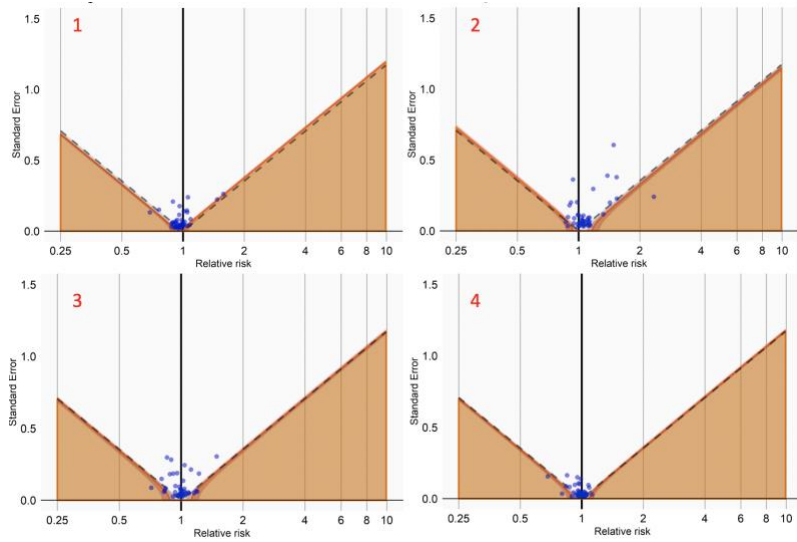

Supplemental Figure III. Kaplan-Meier plots of outcome-free survival for each drug comparison and outcome, comparing metformin and other antidiabetic drugs (sulfonylureas, thiazolidinediones, dipeptidyl peptidase 4 inhibitors, glucagon-like peptide-1 analogues); on-treatment. The Kaplan-Meier curves are shown with CI shading.

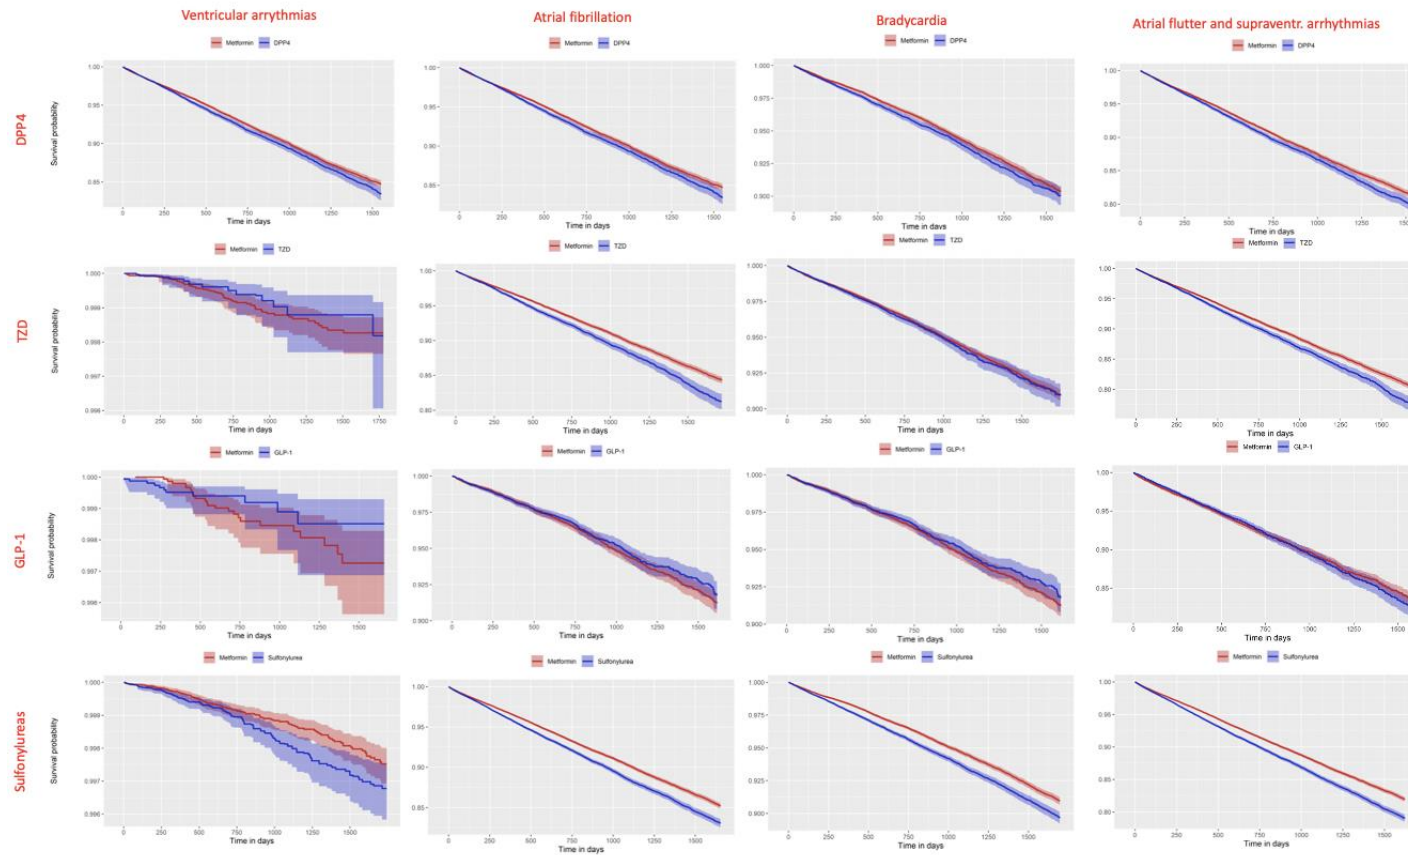



Supplemental Figure IV. Covariate balance (standardized difference of mean) before and after propensity score matching for each drug comparison and outcome, comparing metformin and other antidiabetic drugs (sulfonylureas, thiazolidinediones, dipeptidyl peptidase 4 inhibitors, glucagon-like peptide-1 analogues), intent-to-treat.

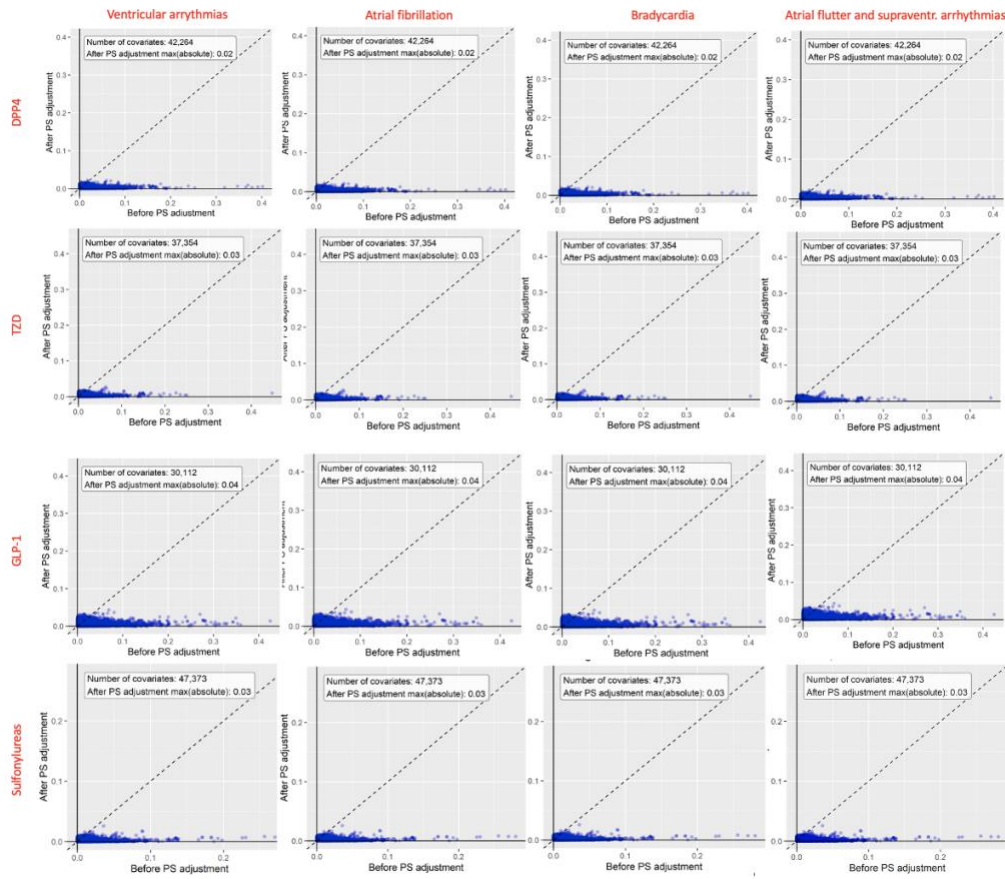

Supplemental Figure V. Empirical calibration plots where estimates below the dashed line in gray area (small area above the orange area) have  $p < 0.05$  using traditional p-value calculation, comparison of first-line anti-diabetic therapy, intent-to-treat analysis. 1 – metformin vs DPP4, 2 – metformin vs GLP1, 3 – metformin vs TZD, 4 – metformin vs sulfonylureas. Estimates in the orange area have  $p < 0.05$  using calibrated p-value calculation.

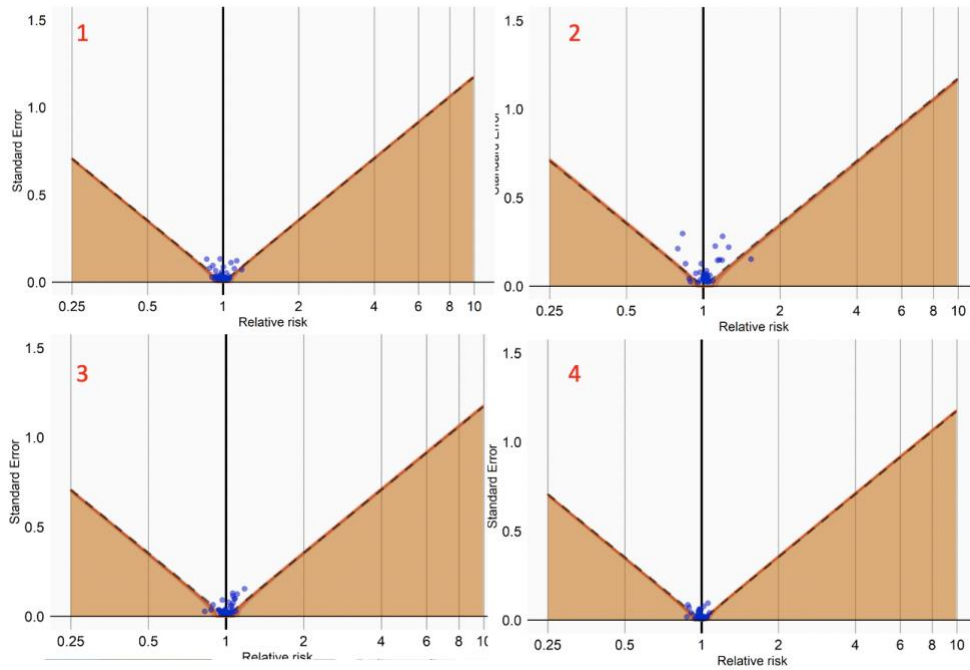

Supplemental Figure VI. Covariate balance (standardized difference of mean) before and after propensity score matching for each drug comparison and outcome, pairwise comparison of combo-therapy with metformin; on-treatment.

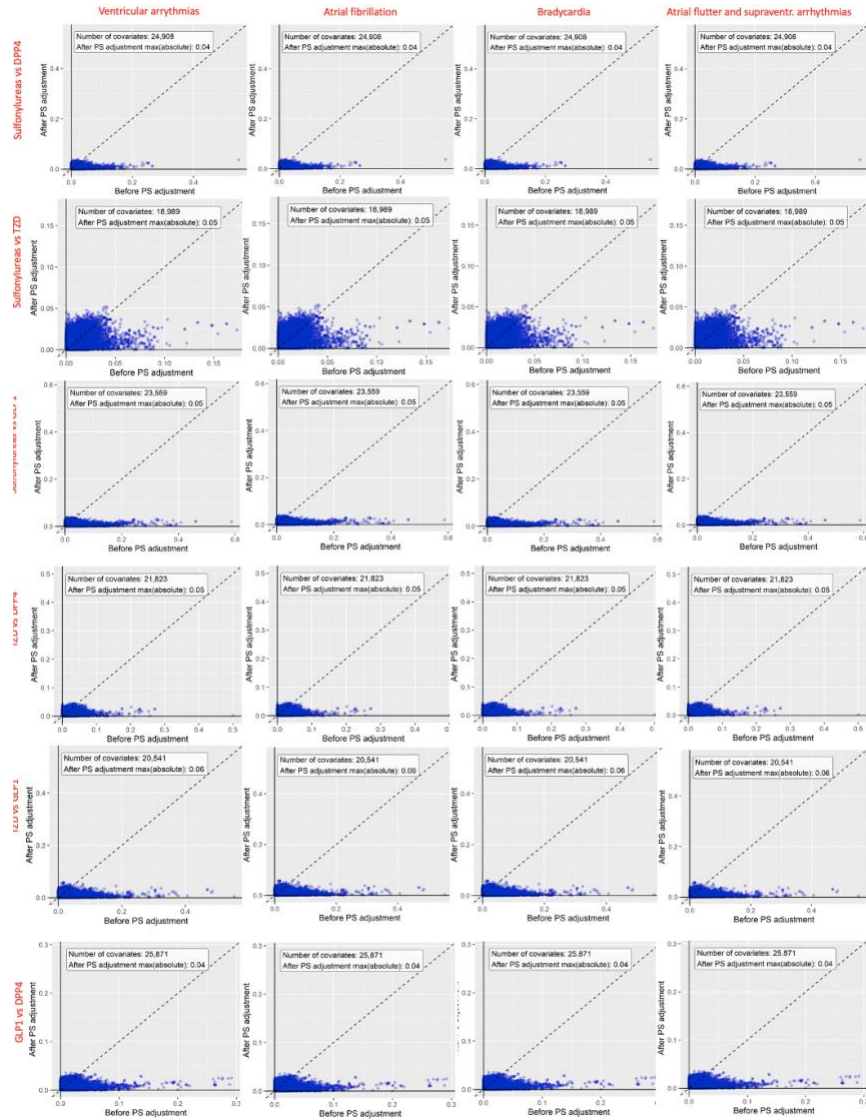

Supplemental Figure VII. Empirical calibration plots where estimates below the dashed line in gray area have  $p < 0.05$  using traditional p-value calculation, pairwise comparison of combo-therapy with metformin; on-treatment. 1 – sulfonylureas vs DPP4, 2 – sulfonylureas vs TZD, 3 – sulfonylureas vs GLP1, 4 – TZD vs DPP4, 5 – TZD vs GLP1, 6 – GLP1 vs DPP4. Estimates in the orange area have  $p < 0.05$  using calibrated p-value calculation.

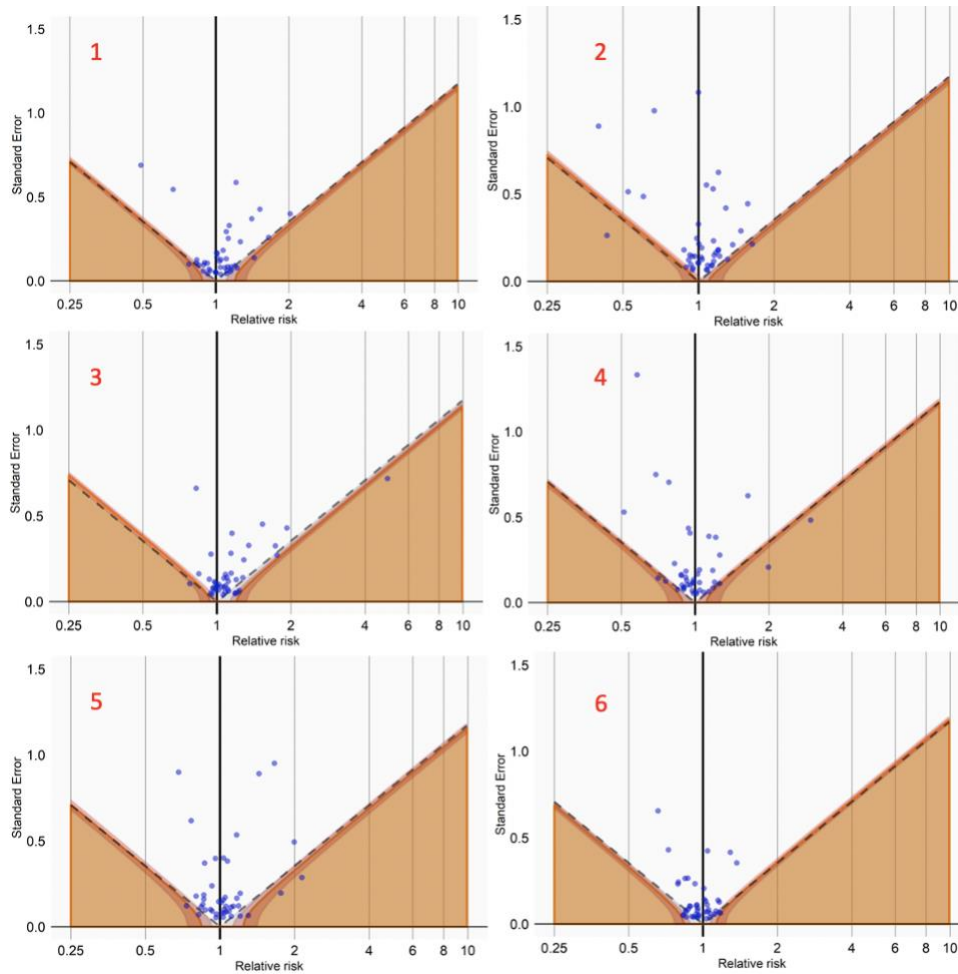

Supplemental Figure VIII. Kaplan-Meier plots of outcome-free survival for each drug comparison and outcome, pairwise comparison of combo-therapy with metformin; on-treatment. The Kaplan-Meier curves are shown with CI shading.

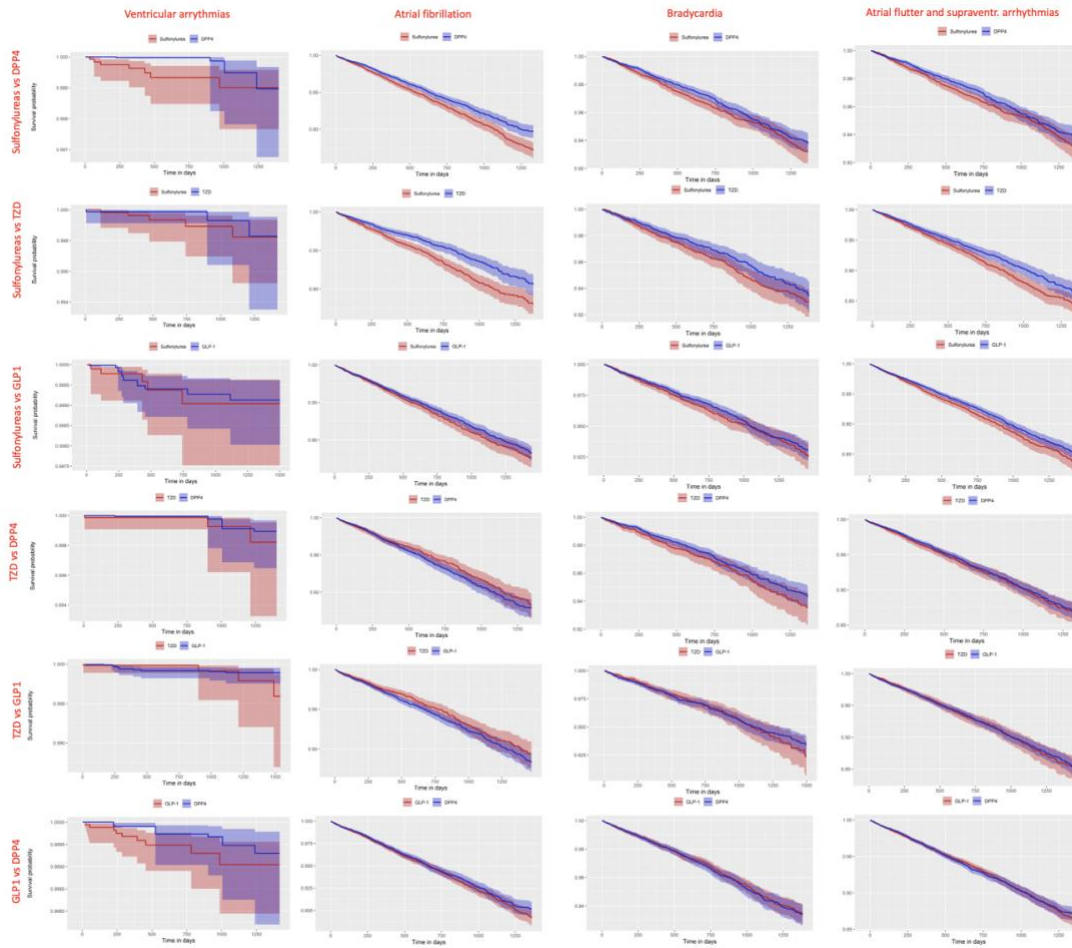

Supplement: NIHMS1673742-supplement-009115_-_Supplemental_Material.pdf [file NIHMS1673742-supplement-009115_-_Supplemental_Material.pdf]
